# Supplementary material
Source: publisher site journal article supplement (https://www.dovepress.com/article/435104)
Supplement: Supplementary file 1 [file get_supplementary_file.php]

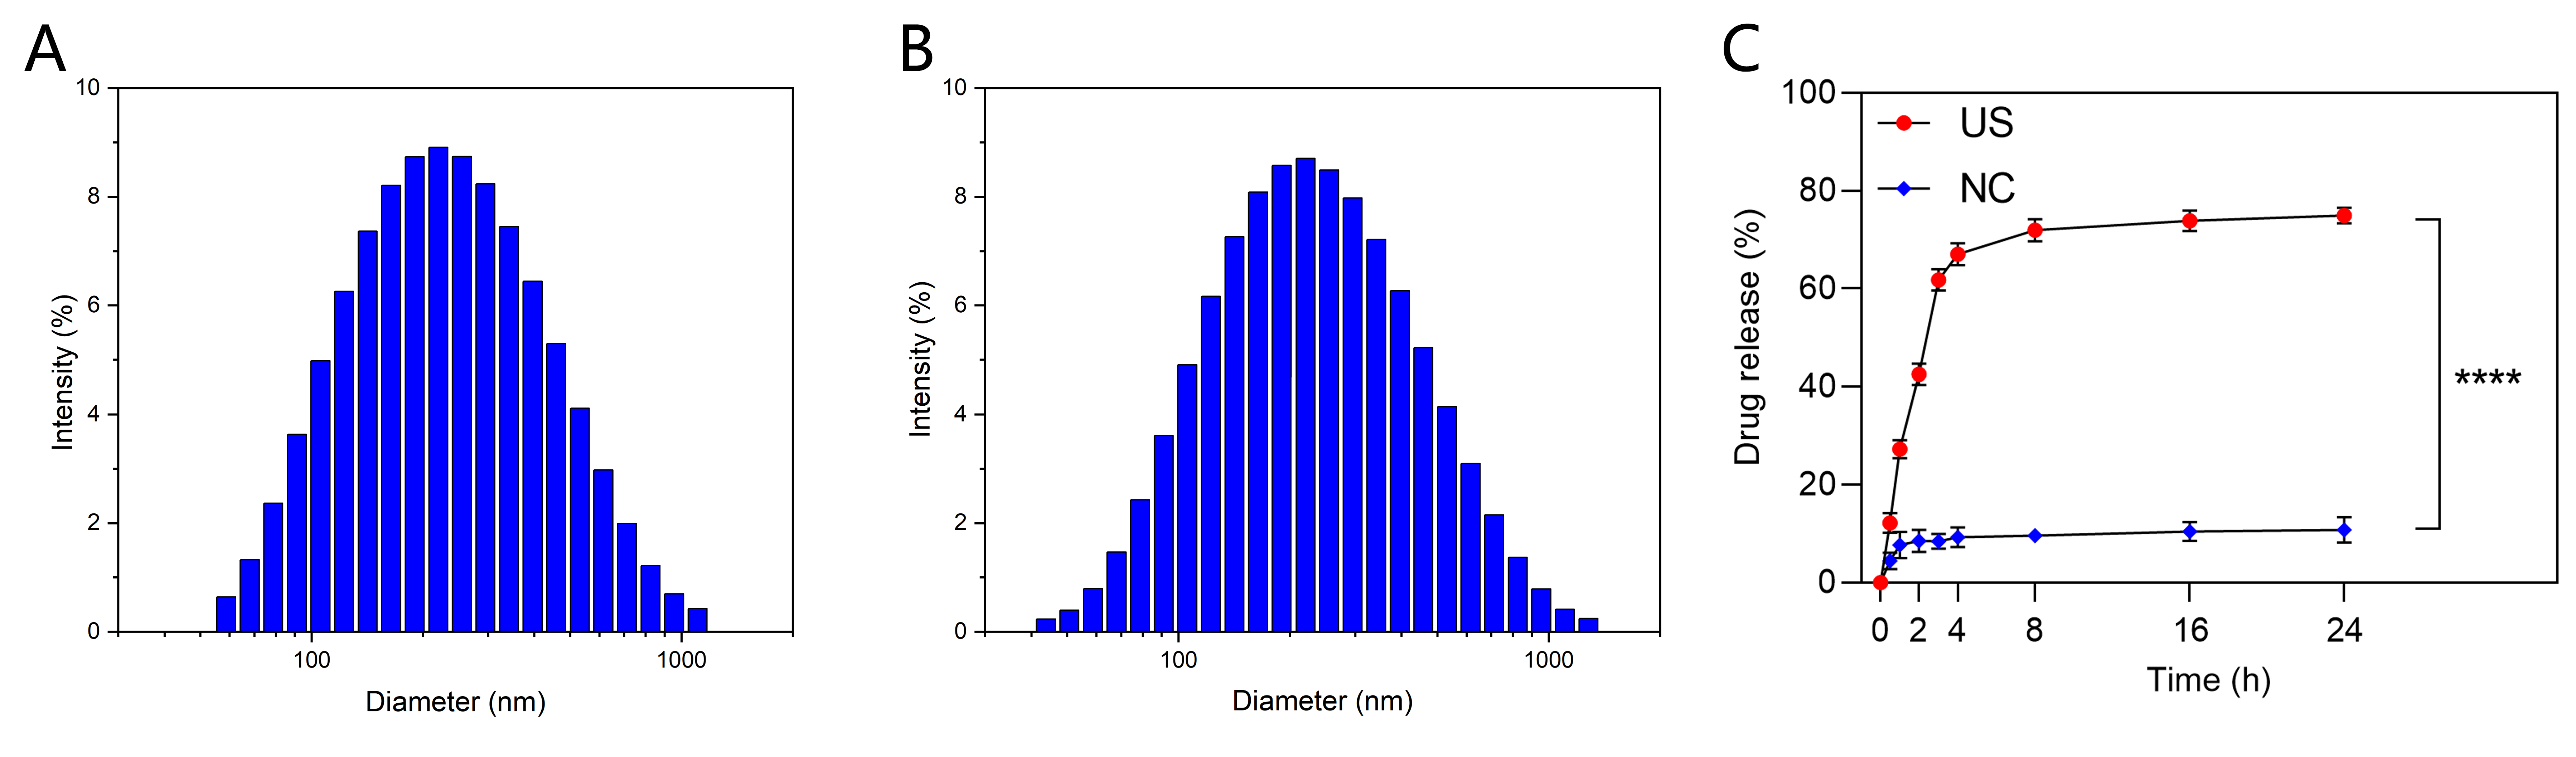


**Figure S1** Stability detection of ICG-NBs and in vitro drug release experiments. **(A)** The particle size distribution of ICG-NBs in PBS solution at for 48 h. **(B)** The particle size distribution of ICG-NBs after 48 h in DMEM containing 10% FBS. **(C)** In vitro collective release of ICG from ICG-NBs. ****p < 0.0001.


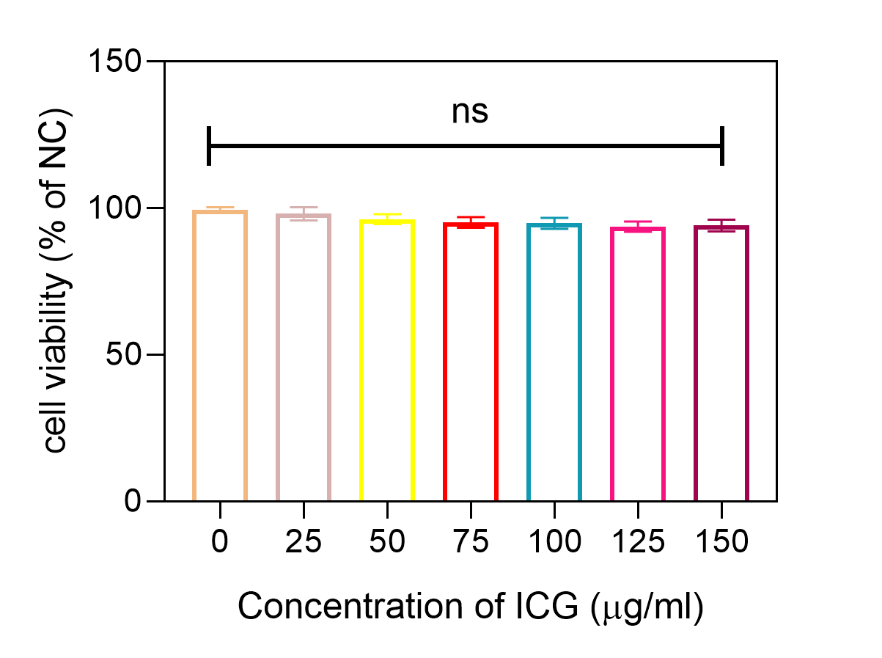


**Figure S2** The cell viability of WRL68 cells treated with different concentrations of ICG.


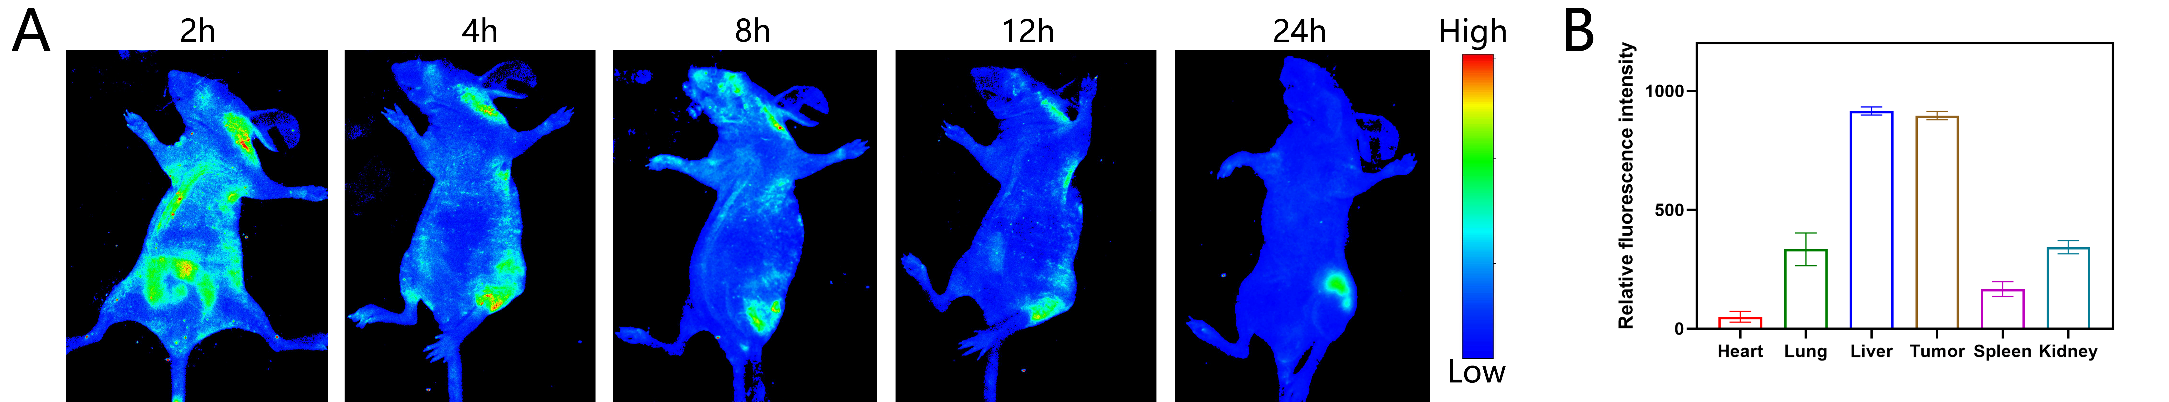


**Figure S3** Biological distribution of ICG-NBs. **(A)** The biodistribution of ICG-NBs in HepG2 tumor-bearing mice at different time points after injection. **(B)**The relative fluorescence intensity in organs and tumors 24 h after injection.
